# Supplementary material for: Tailored supramolecular gel and microemulsion crystallization strategies – is isoniazid really monomorphic?
Source: Royal Society of Chemistry journal article supplement (doi:10.1039/c8ce00066b), 2018-01-01
Supplement: c8ce00066b1.pdf [file c8ce00066b1.pdf]

## Tailored Supramolecular Gels for Isoniazid Crystallization – is Isoniazid Really Monomorphic?

Stuart R. Kennedy<sup>a</sup>, Christopher D. Jones<sup>a</sup>, Dmitry S. Yufit<sup>a</sup>, Catherine E. Nicholson<sup>b</sup>, Sharon J. Cooper<sup>a</sup> and Jonathan W. Steed<sup>\*a</sup>

### Supplementary Information

| Solvent          | Initial | 30 mins | 1 hour | 1 day | 1 week |
|------------------|---------|---------|--------|-------|--------|
| 1,4-dioxane*     | PG      | G       | G      | CG    | CG     |
| 1-butanol*       | G       | G       | G      | G     | G      |
| 1-pentanol*      | G       | G       | G      | G     | G      |
| 1-propanol*      | G       | G       | G      | G     | G      |
| 2-butanol*       | G       | G       | G      | G     | G      |
| 2-ethylpyridine* | G       | G       | G      | G     | G      |
| 2-picoline*      | G       | G       | G      | G     | G      |
| 2-propanol*      | G       | G       | G      | G     | G      |
| 3-picoline       | G       | G       | G      | G     | G      |
| 4-ethylpyridine  | G       | G       | G      | G     | G      |
| 4-picoline       | G       | G       | G      | G     | G      |
| Acetic acid      | G       | G       | G      | G     | G      |
| Cyclohexanone    | G       | G       | G      | G     | G      |
| Cyclopentanone   | G       | G       | G      | G     | G      |
| DMA              | S       | S       | S      | S     | G      |
| DMF              | G       | G       | G      | G     | G      |
| Ethanol*         | G       | G       | G      | G     | G      |
| Methanol*        | G       | G       | G      | G     | G      |
| Nitrobenzene     | G       | G       | G      | G     | G      |
| Pyridine         | G       | G       | G      | G     | G      |

Table S1. Gelation behaviour of **1** showing tests resulting in gelation (total 51 solvents examined). Key: G is gel, PG is partial gel, CG is collapsed gel and S is solution. The use of \* highlight the samples in which the gels are opaque.

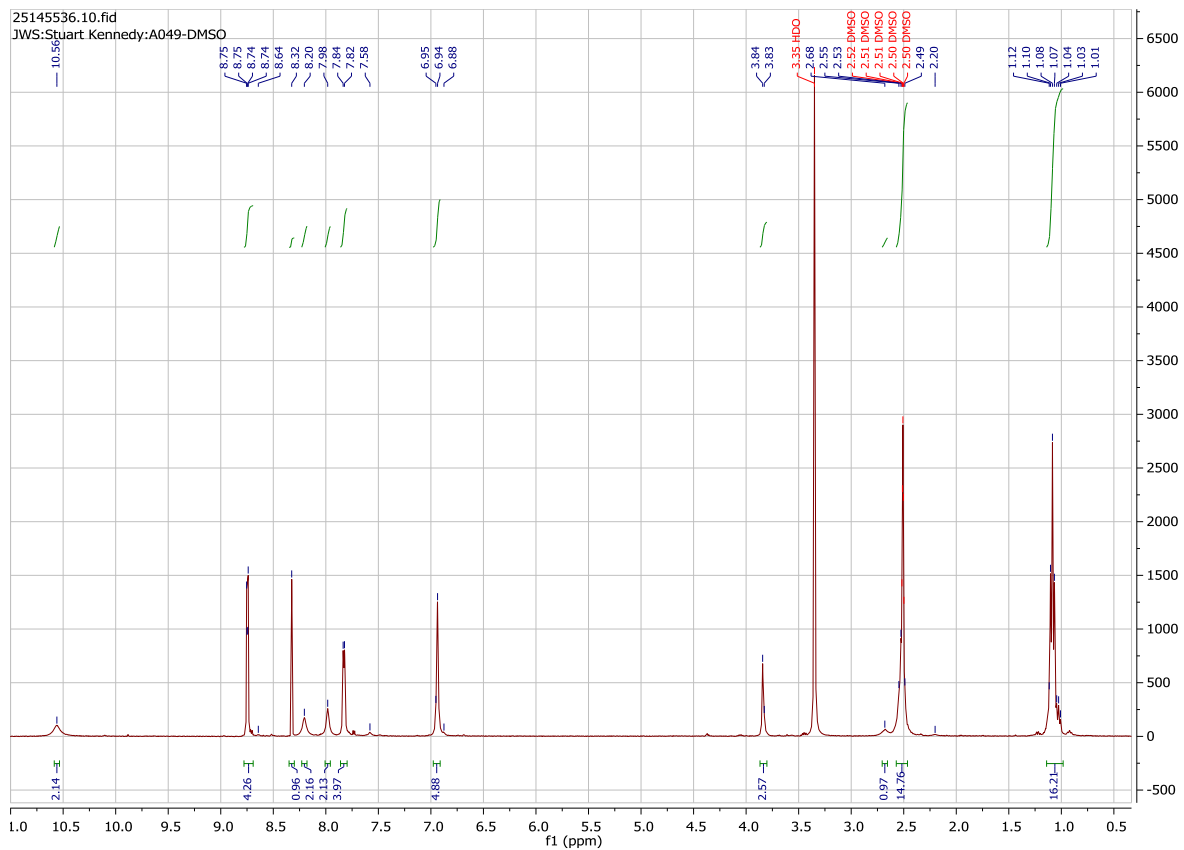

Figure S1  $^1\text{H}$  NMR spectrum of **1** in DMSO

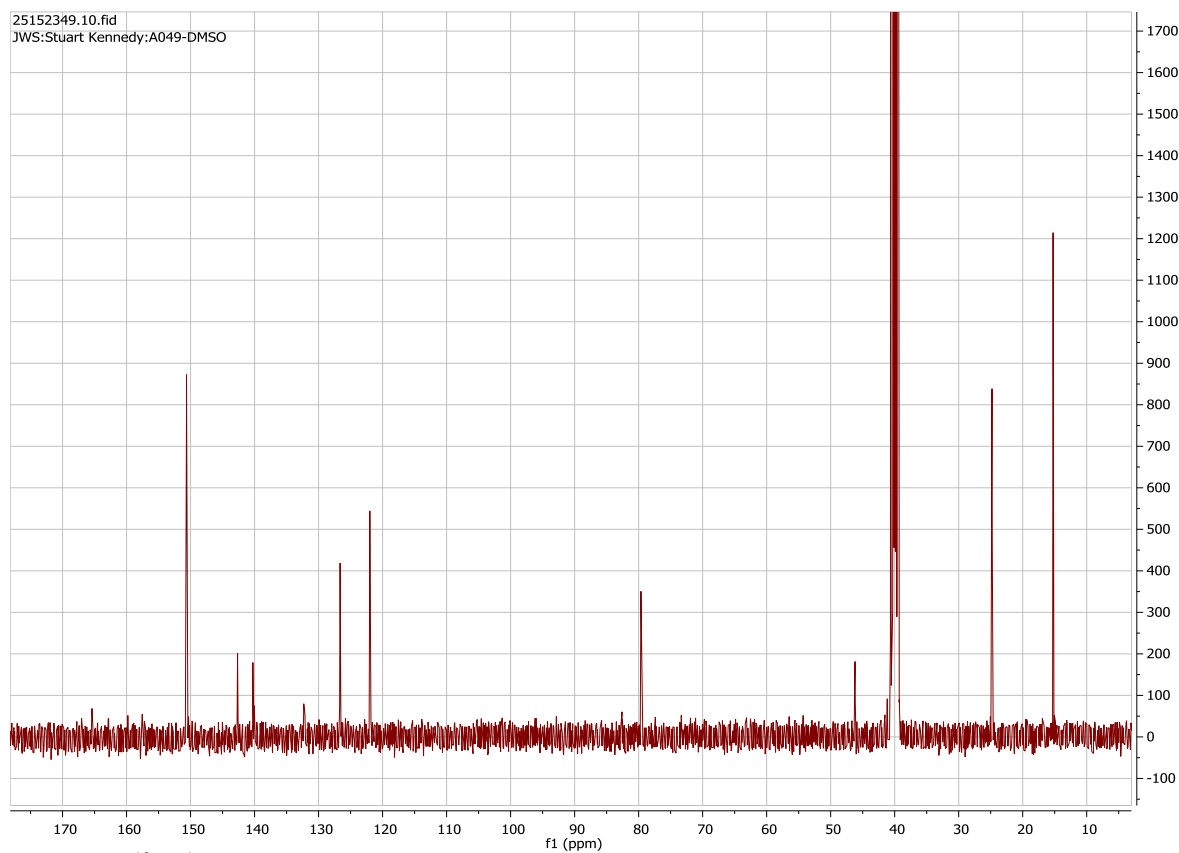

Figure S2  $^{13}\text{C}\{^1\text{H}\}$  NMR spectrum of **2** in DMSO

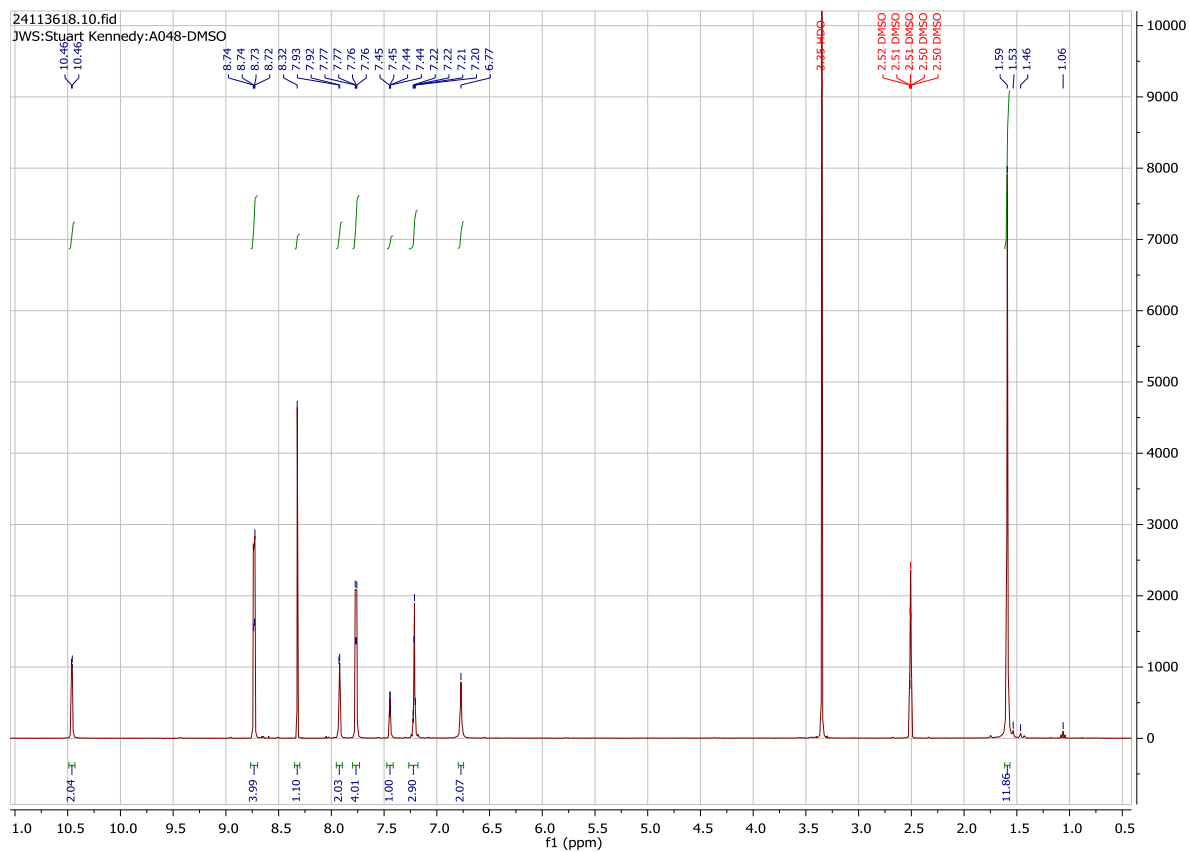

Figure S3  $^1\text{H}$  NMR spectrum of **2** in DMSO

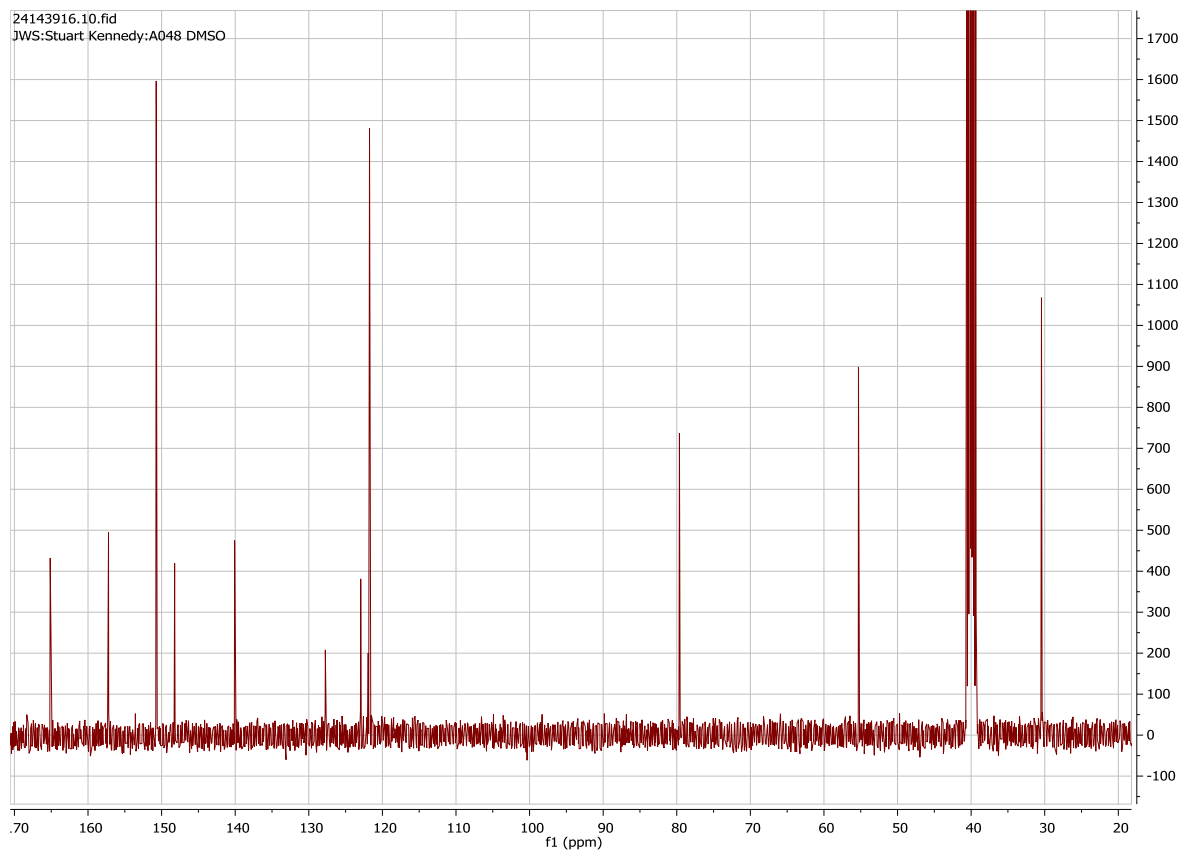

Figure S4  $^{13}\text{C}\{^1\text{H}\}$  NMR spectrum of **2** in DMSO.

A097b, ESI - no column MeCN (TQD), RT 0.2350 mins, Scan# 27, NL 5.222E7, 28/01/2016 15:22, m/z [54.4-1972.4]

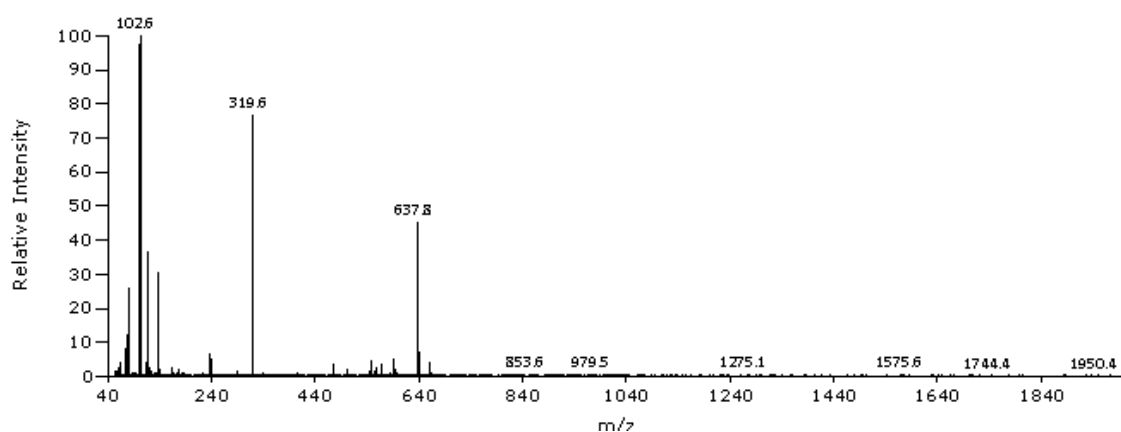

Figure S5 ESI-MS of 1.

A048, ESI - LC MeOH (TQD), RT 2.4187 mins, Scan# 278, NL 8.457E6, 14/05/2015 13:48, m/z [100.9-1980.2]

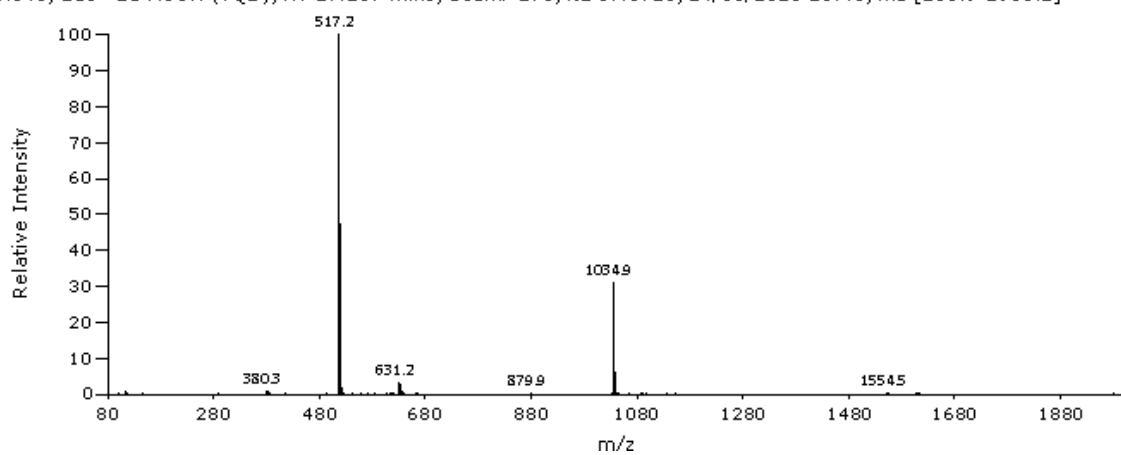

Figure S6 ESI-MS of 2.

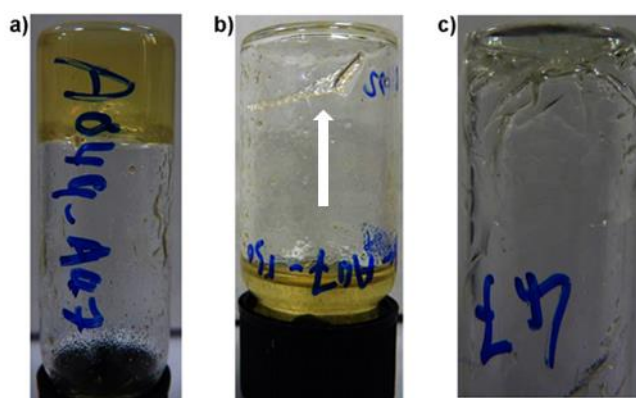

Figure S7. a) Nitrobenzene gel of 1 undergoing the inversion test. b) Single sample-spanning isoniazid crystal obtained after the collapse of a nitrobenzene gel. c) Relatively small needle-shaped crystals of isoniazid obtained from nitrobenzene.
